# Supplementary material for: Hydroclimatic control on suspended sediment dynamics of aregulated Alpine catchment: a conceptual approach
Source: Copernicus journal article supplement (doi:10.5194/hess-2018-5), 2018-01-09
Supplement: Supplementary file 1 [file hess-2018-5-supplement.pdf]

# Supplementary Material: Hydroclimatic control on suspended sediment dynamics of a regulated Alpine catchment: a conceptual approach

Anna Costa, Daniela Anghileri, Peter Molnar

5

Table S1: List of the main 13 hydropower reservoirs included in this study and their capacity.

| Name           | Capacity<br>[10 <sup>6</sup> m <sup>3</sup> ] |
|----------------|-----------------------------------------------|
| Griessee       | 18                                            |
| Mattmark       | 100                                           |
| Moiry          | 77                                            |
| Grande Dixence | 400                                           |
| Mauvoisin      | 211.5                                         |
| Les Toules     | 20                                            |
| Emosson        | 205                                           |
| Salanfe        | 40                                            |
| Tseuzier       | 50                                            |
| Cleuson        | 20                                            |
| Gibidum        | 9.2                                           |
| Illsee         | 6.6                                           |
| Arnensee       | 10.3                                          |

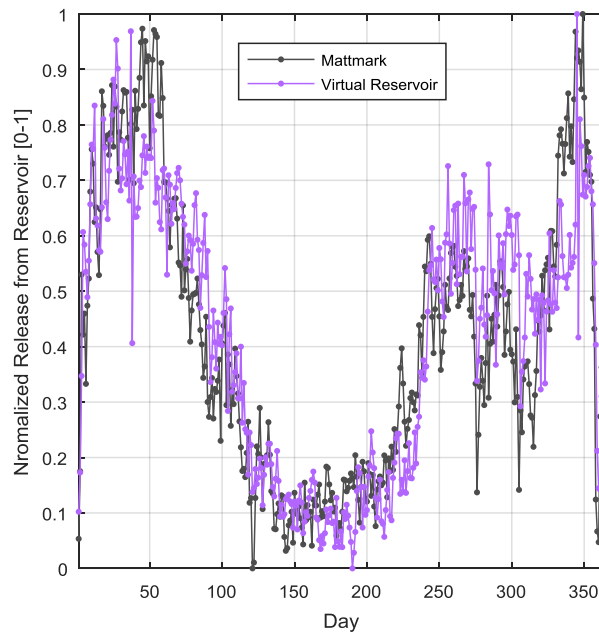

10

Figure S1: Mean daily normalized water release from the hydropower reservoir Mattmark (average of observations over the period January 1994 – December 2015) and from the virtual reservoir (average of simulations over the period January 1975 – December 2015).

15
